# Supplementary material
Source: PubMed Central journal article supplement (PMC3587708)
Supplement: cr2012173x4.pdf [file cr2012173x4.pdf]

## Supplementary information, Table S4

**Table S4** The windows and the corresponding simulation steps in FEP calculations

|                        |                |                |               |              |               |                |
|------------------------|----------------|----------------|---------------|--------------|---------------|----------------|
| $\lambda$              | [0,0.0001]     | [0.0001,0.001] | [0.001,0.005] | [0.005,0.01] | [0.01,0.0125] | [0.0125,0.015] |
| Steps( $\times 10^4$ ) | 4              | 4              | 4             | 4            | 3             | 3              |
| $\lambda$              | [0.015,0.0175] | [0.0175,0.02]  | [0.02,0.025]  | [0.025,0.03] | [0.03,0.035]  | [0.035,0.04]   |
| Steps( $\times 10^4$ ) | 3              | 3              | 3             | 3            | 3             | 3              |
| $\lambda$              | [0.04,0.045]   | [0.045,0.05]   | [0.05,0.055]  | [0.055,0.06] | [0.06,0.0625] | [0.0625,0.065] |
| Steps( $\times 10^4$ ) | 3              | 3              | 3             | 3            | 4             | 4              |
| $\lambda$              | [0.065,0.0675] | [0.0675,0.07]  | [0.07,0.075]  | [0.075,0.08] | [0.08,0.085]  | [0.085,0.09]   |
| Steps( $\times 10^4$ ) | 4              | 4              | 3             | 3            | 3             | 3              |
| $\lambda$              | [0.09,0.095]   | [0.095,0.1]    | [0.1,0.105]   | [0.105,0.11] | [0.11,0.115]  | [0.115,0.12]   |
| Steps( $\times 10^4$ ) | 3              | 3              | 3             | 3            | 3             | 3              |
| $\lambda$              | [0.12,0.125]   | [0.125,0.13]   | [0.13,0.135]  | [0.135,0.14] | [0.14,0.145]  | [0.145,0.15]   |
| Steps( $\times 10^4$ ) | 3              | 3              | 3             | 3            | 3             | 3              |
| $\lambda$              | [0.15,0.155]   | [0.155,0.16]   | [0.16,0.165]  | [0.165,0.17] | [0.17,0.175]  | [0.175,0.18]   |
| Steps( $\times 10^4$ ) | 3              | 3              | 3             | 3            | 3             | 3              |
| $\lambda$              | [0.18,0.185]   | [0.185,0.19]   | [0.19,0.195]  | [0.195,0.2]  | [0.2,0.205]   | [0.205,0.21]   |
| Steps( $\times 10^4$ ) | 3              | 3              | 3             | 3            | 3             | 3              |
| $\lambda$              | [0.21,0.215]   | [0.215,0.22]   | [0.22,0.225]  | [0.225,0.23] | [0.23,0.235]  | [0.235,0.24]   |
| Steps( $\times 10^4$ ) | 3              | 3              | 3             | 3            | 3             | 3              |
| $\lambda$              | [0.24,0.245]   | [0.245,0.25]   | [0.25,0.255]  | [0.255,0.26] | [0.26,0.265]  | [0.265,0.27]   |
| Steps( $\times 10^4$ ) | 3              | 3              | 3             | 3            | 3             | 3              |
| $\lambda$              | [0.27,0.275]   | [0.275,0.28]   | [0.28,0.285]  | [0.285,0.29] | [0.29,0.295]  | [0.295,0.3]    |
| Steps( $\times 10^4$ ) | 3              | 3              | 3             | 3            | 3             | 3              |
| $\lambda$              | [0.3,0.305]    | [0.305,0.31]   | [0.31,0.315]  | [0.315,0.32] | [0.32,0.33]   | [0.33,0.34]    |
| Steps( $\times 10^4$ ) | 3              | 3              | 3             | 3            | 3             | 3              |
| $\lambda$              | [0.34,0.35]    | [0.35,0.36]    | [0.36,0.37]   | [0.37,0.38]  | [0.38,0.39]   | [0.39,0.4]     |
| Steps( $\times 10^4$ ) | 3              | 3              | 3             | 3            | 3             | 3              |
| $\lambda$              | [0.4,0.405]    | [0.405,0.41]   | [0.41,0.415]  | [0.415,0.42] | [0.42,0.425]  | [0.425,0.43]   |
| Steps( $\times 10^4$ ) | 3              | 3              | 3             | 3            | 3             | 3              |
| $\lambda$              | [0.43,0.435]   | [0.435,0.44]   | [0.44,0.445]  | [0.445,0.45] | [0.45,0.455]  | [0.445,0.46]   |
| Steps( $\times 10^4$ ) | 3              | 3              | 3             | 3            | 3             | 3              |
| $\lambda$              | [0.46,0.465]   | [0.465,0.47]   | [0.47,0.475]  | [0.475,0.48] | [0.48,0.485]  | [0.485,0.49]   |
| Steps( $\times 10^4$ ) | 3              | 3              | 3             | 3            | 3             | 3              |
| $\lambda$              | [0.49,0.495]   | [0.495,0.5]    | [0.5,0.505]   | [0.505,0.51] | [0.51,0.515]  | [0.515,0.52]   |
| Steps( $\times 10^4$ ) | 3              | 3              | 3             | 3            | 3             | 3              |
| $\lambda$              | [0.52,0.525]   | [0.525,0.53]   | [0.53,0.535]  | [0.535,0.54] | [0.54,0.545]  | [0.545,0.55]   |
| Steps( $\times 10^4$ ) | 3              | 3              | 3             | 3            | 3             | 3              |
| $\lambda$              | [0.55,0.555]   | [0.555,0.56]   | [0.56,0.565]  | [0.565,0.57] | [0.57,0.575]  | [0.575,0.58]   |
| Steps( $\times 10^4$ ) | 3              | 3              | 3             | 3            | 3             | 3              |
| $\lambda$              | [0.58,0.585]   | [0.585,0.59]   | [0.59,0.595]  | [0.595,0.6]  | [0.6,0.605]   | [0.605,0.61]   |
| Steps( $\times 10^4$ ) | 3              | 3              | 3             | 3            | 3             | 3              |

|                        |                |              |              |              |              |               |
|------------------------|----------------|--------------|--------------|--------------|--------------|---------------|
| $\lambda$              | [0.61,0.615]   | [0.615,0.62] | [0.62,0.625] | [0.625,0.63] | [0.63,0.635] | [0.635,0.64]  |
| Steps( $\times 10^4$ ) | 3              | 3            | 3            | 3            | 3            | 3             |
| $\lambda$              | [0.64,0.645]   | [0.645,0.65] | [0.65,0.655] | [0.655,0.66] | [0.66,0.665] | [0.665,0.67]  |
| Steps( $\times 10^4$ ) | 3              | 3            | 3            | 3            | 3            | 3             |
| $\lambda$              | [0.67,0.675]   | [0.675,0.68] | [0.68,0.685] | [0.685,0.69] | [0.69,0.695] | [0.695,0.7]   |
| Steps( $\times 10^4$ ) | 3              | 3            | 3            | 3            | 3            | 3             |
| $\lambda$              | [0.7,0.705]    | [0.705,0.71] | [0.71,0.715] | [0.715,0.72] | [0.72,0.725] | [0.725,0.73]  |
| Steps( $\times 10^4$ ) | 3              | 3            | 3            | 3            | 3            | 3             |
| $\lambda$              | [0.73,0.735]   | [0.735,0.74] | [0.74,0.745] | [0.745,0.75] | [0.75,0.755] | [0.755,0.76]  |
| Steps( $\times 10^4$ ) | 3              | 3            | 3            | 3            | 3            | 3             |
| $\lambda$              | [0.76,0.765]   | [0.765,0.77] | [0.77,0.775] | [0.775,0.78] | [0.78,0.785] | [0.785,0.79]  |
| Steps( $\times 10^4$ ) | 3              | 3            | 3            | 3            | 3            | 3             |
| $\lambda$              | [0.79,0.795]   | [0.795,0.8]  | [0.8,0.805]  | [0.805,0.81] | [0.81,0.815] | [0.815,0.82]  |
| Steps( $\times 10^4$ ) | 3              | 3            | 3            | 3            | 3            | 3             |
| $\lambda$              | [0.82,0.825]   | [0.825,0.83] | [0.83,0.835] | [0.835,0.84] | [0.84,0.845] | [0.845,0.85]  |
| Steps( $\times 10^4$ ) | 3              | 3            | 3            | 3            | 3            | 3             |
| $\lambda$              | [0.85,0.855]   | [0.855,0.86] | [0.86,0.865] | [0.865,0.87] | [0.87,0.875] | [0.875,0.88]  |
| Steps( $\times 10^4$ ) | 3              | 3            | 3            | 3            | 3            | 3             |
| $\lambda$              | [0.88,0.885]   | [0.885,0.89] | [0.89,0.895] | [0.895,0.9]  | [0.9,0.905]  | [0.905,0.91]  |
| Steps( $\times 10^4$ ) | 3              | 3            | 3            | 3            | 3            | 3             |
| $\lambda$              | [0.91,0.915]   | [0.915,0.92] | [0.92,0.925] | [0.925,0.93] | [0.93,0.935] | [0.935,0.94]  |
| Steps( $\times 10^4$ ) | 3              | 3            | 3            | 3            | 3            | 3             |
| $\lambda$              | [0.94,0.945]   | [0.945,0.95] | [0.95,0.955] | [0.955,0.96] | [0.96,0.965] | [0.965,0.97]  |
| Steps( $\times 10^4$ ) | 3              | 3            | 3            | 3            | 4            | 4             |
| $\lambda$              | [0.97,0.975]   | [0.975,0.98] | [0.98,0.985] | [0.985,0.99] | [0.99,0.995] | [0.995,0.999] |
| Steps( $\times 10^4$ ) | 4              | 4            | 4            | 4            | 4            | 4             |
| $\lambda$              | [0.999,0.9999] | [0.9999,1]   |              |              |              |               |
| Steps( $\times 10^4$ ) | 4              | 4            |              |              |              |               |

The 4000 steps in pre-equilibration are included here in each window. In free energy estimation, the pre-equilibration steps are excluded from the calculation.
