# Supplementary material
Source: PubMed Central journal article supplement (PMC3587708)
Supplement: cr2012173x11.pdf [file cr2012173x11.pdf]

## Supplementary information, Figure S2

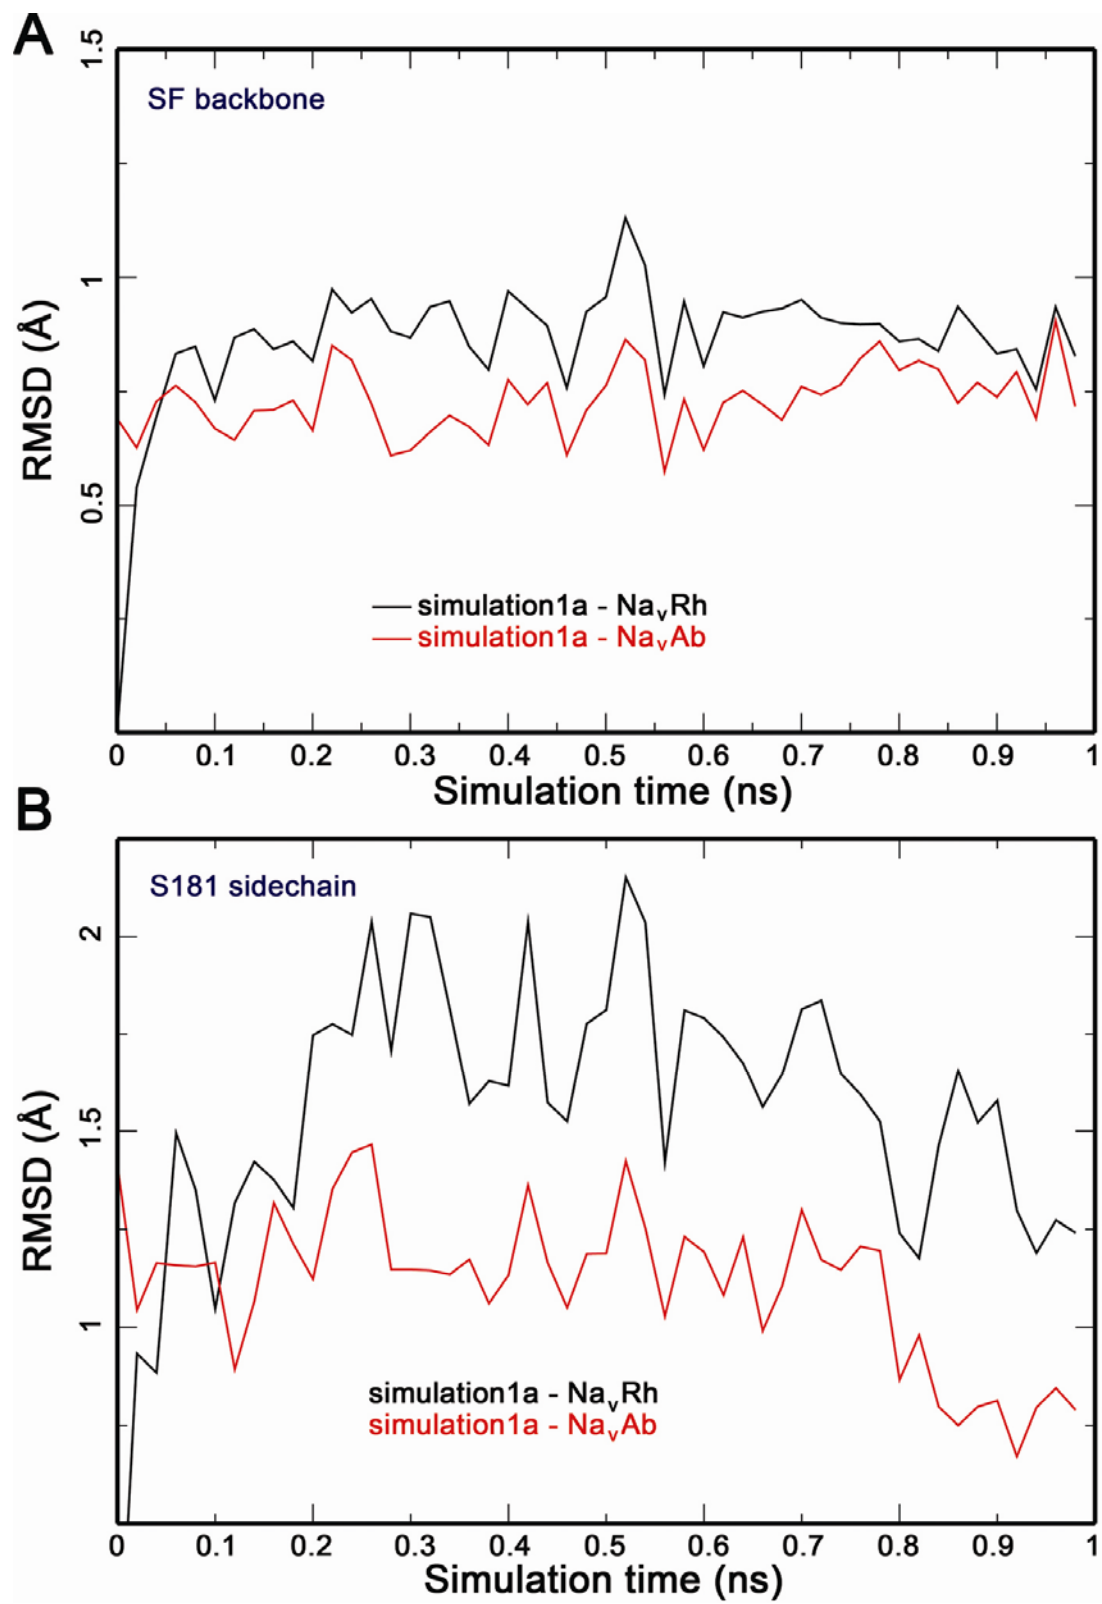

**Figure S2** Structural changes of site 2 during Na<sup>+</sup> permeation. **(A)** The SF backbone of the simulated structure deviates from the crystal structure of the Na<sub>v</sub>Rh (black curve). Its structural distance to Na<sub>v</sub>Ab stays almost constant (red curve). **(B)** The sidechains of S181 deviate from their position in Na<sub>v</sub>Rh (black curve), but they move closer to the position in Na<sub>v</sub>Ab (red curve).
