# Supplementary material
Source: PubMed Central journal article supplement (PMC3587708)
Supplement: cr2012173x18.pdf [file cr2012173x18.pdf]

## Supplementary information, Figure S9

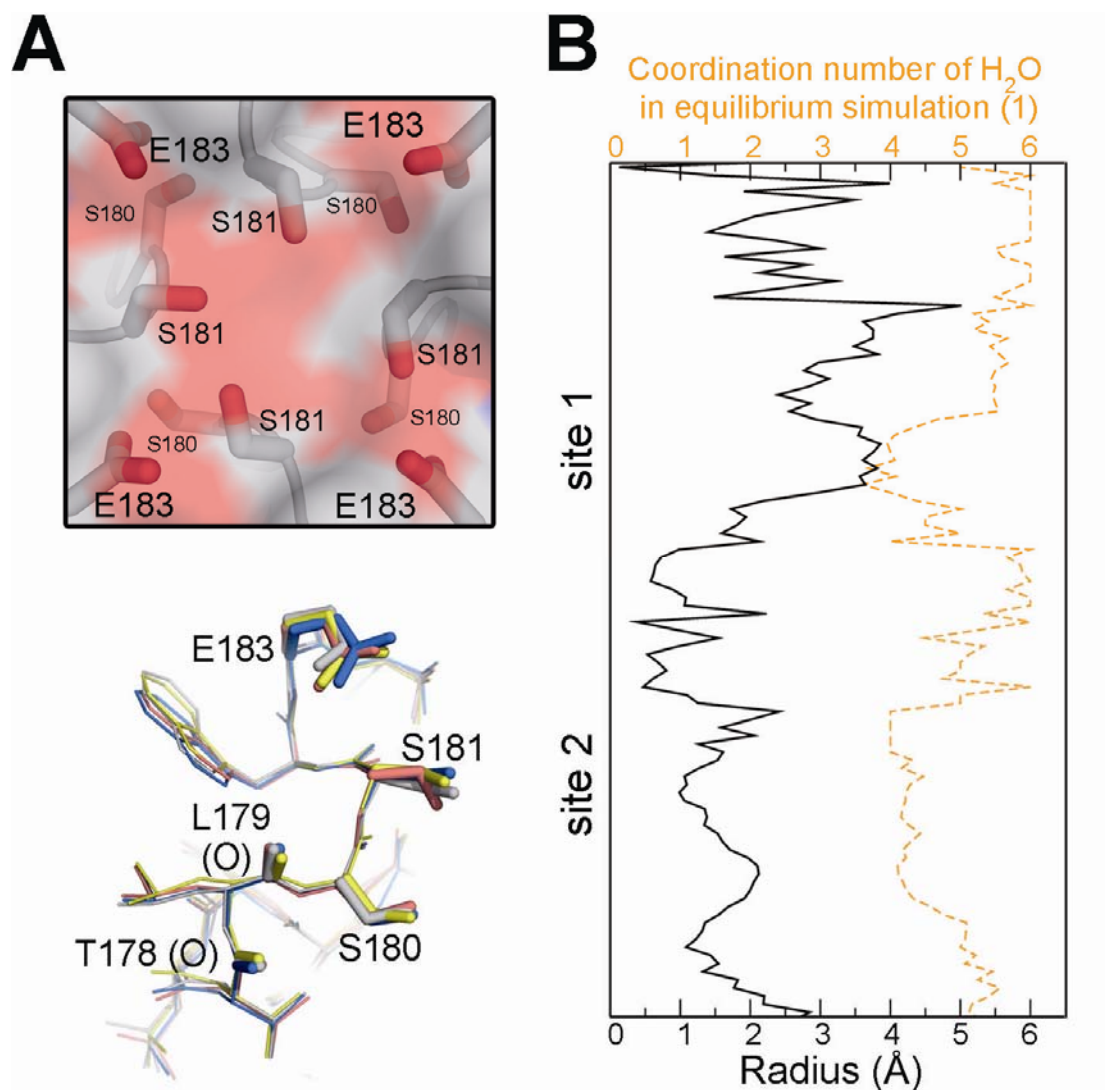

**Figure S9**  $\text{Na}^+$  penetrates  $\text{Na}_v\text{Rh}$  away from the axial center of SF. **(A)** The SF of  $\text{Na}_v\text{Rh}$  in the crystal structure (PDB code: 4DXW) is asymmetric. A semi-transparent surface illustration of periplasmic entrance to SF (*upper panel*) and superposition of SF from the four protomers (*lower panel*) indicate the structural heterogeneity among the SFs of  $\text{Na}_v\text{Rh}$  subunits. Oxygen atoms are colored red. **(B)** The radial distribution (black solid line) of  $\text{Na}^+$  anti-correlates with water coordination number (orange dashed line). The radii from the center in XY plane are shown as a function of the SF axis (Z). The data are derived from simulation 1 (*right panel*).
